# Supplementary material for: A new small molecule gelator and 3D framework ligator of lead(ii)
Source: Royal Society of Chemistry journal article supplement (doi:10.1039/c5ce01689d), 2015-01-01
Supplement: c5ce01689d1.pdf [file c5ce01689d1.pdf]

# A new small molecule gelator and 3D framework ligator of lead(II)

Jane V. Knichal, William J. Gee, Andrew D. Burrows,\* Paul R. Raithby\* and  
Chick C. Wilson\*

*Department of Chemistry  
University of Bath  
Claverton Down, Bath, BA2 7AY*

## Supporting Information

\* To whom correspondence should be addressed.

Email: [C.C.Wilson@bath.ac.uk](mailto:C.C.Wilson@bath.ac.uk) Telephone: +44 (0) 1225 386143

### S1: <sup>1</sup>H-NMR Spectrum of Me<sub>2</sub>abd (CDCl<sub>3</sub>)

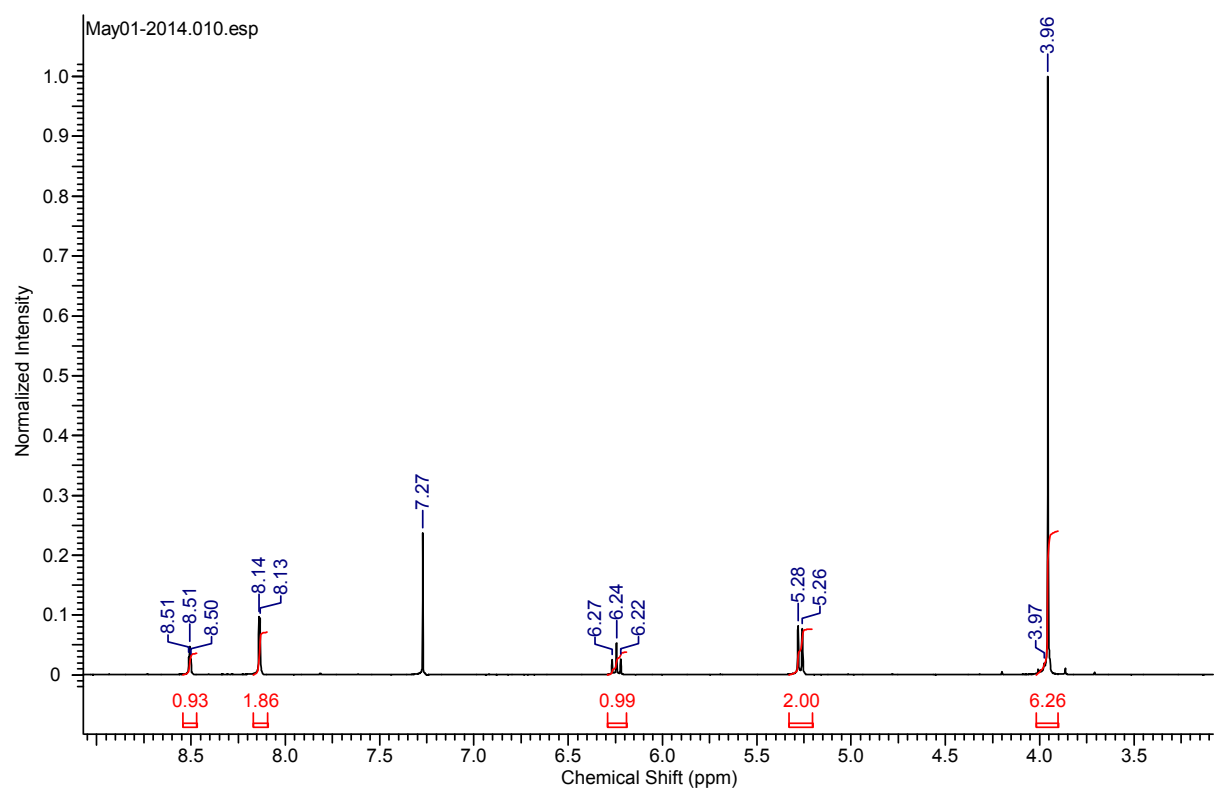

### S2: <sup>13</sup>C-NMR Spectrum of Me<sub>2</sub>abd (CDCl<sub>3</sub>)

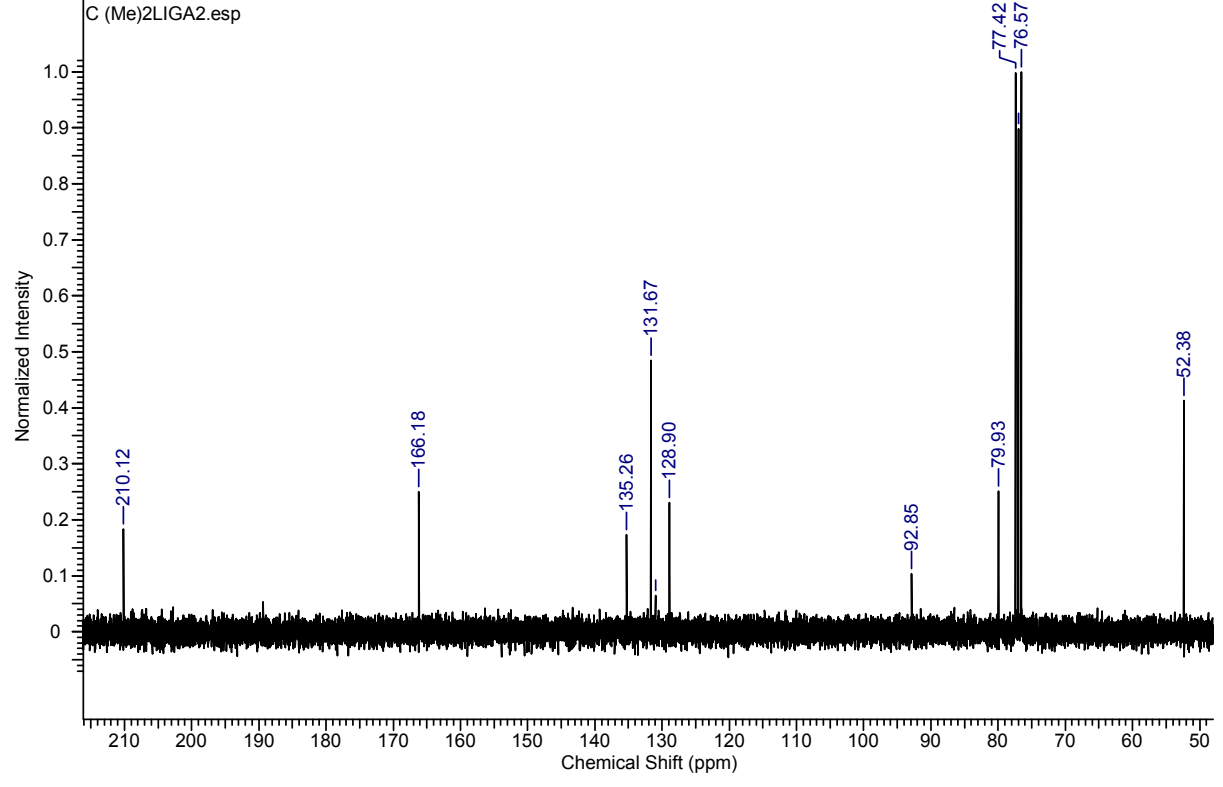

**S3: <sup>1</sup>H-NMR Spectrum of H<sub>2</sub>abd (DMSO-d<sub>6</sub>)**

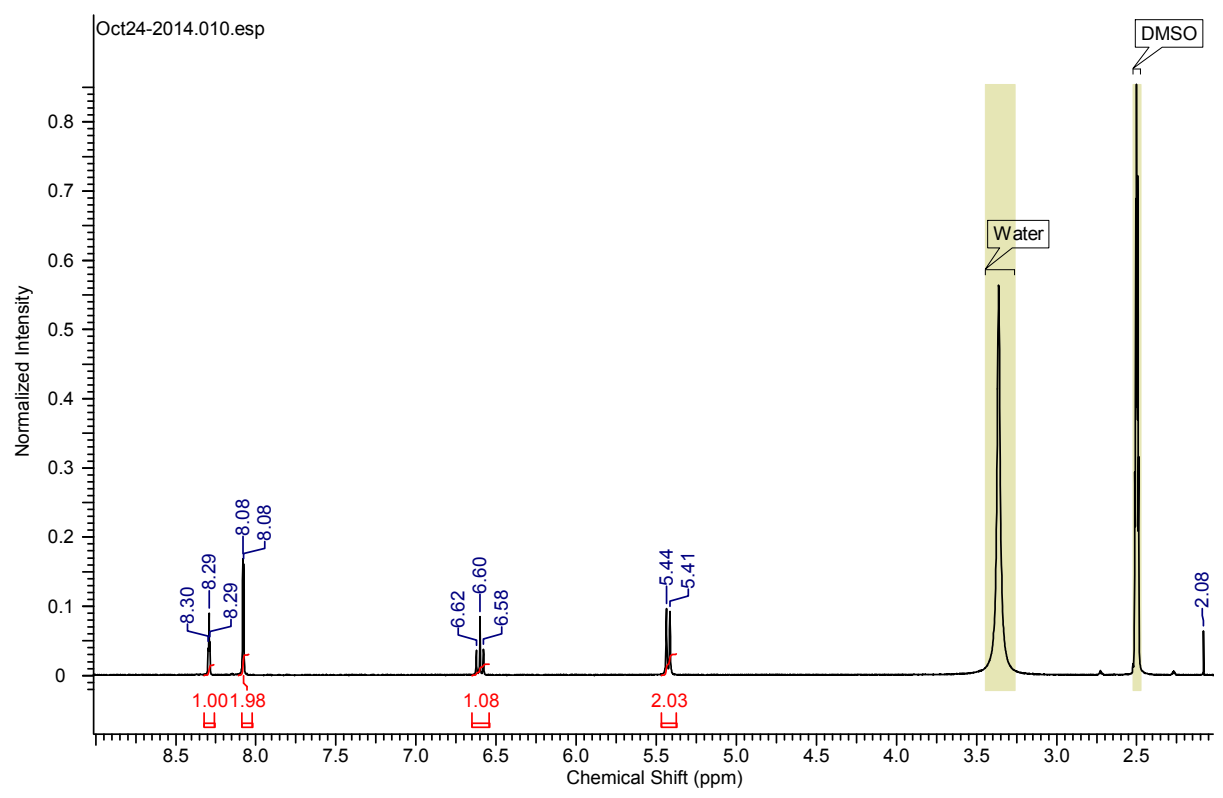

**S4: <sup>13</sup>C-NMR Spectrum of H<sub>2</sub>abd (CD<sub>3</sub>OD)**

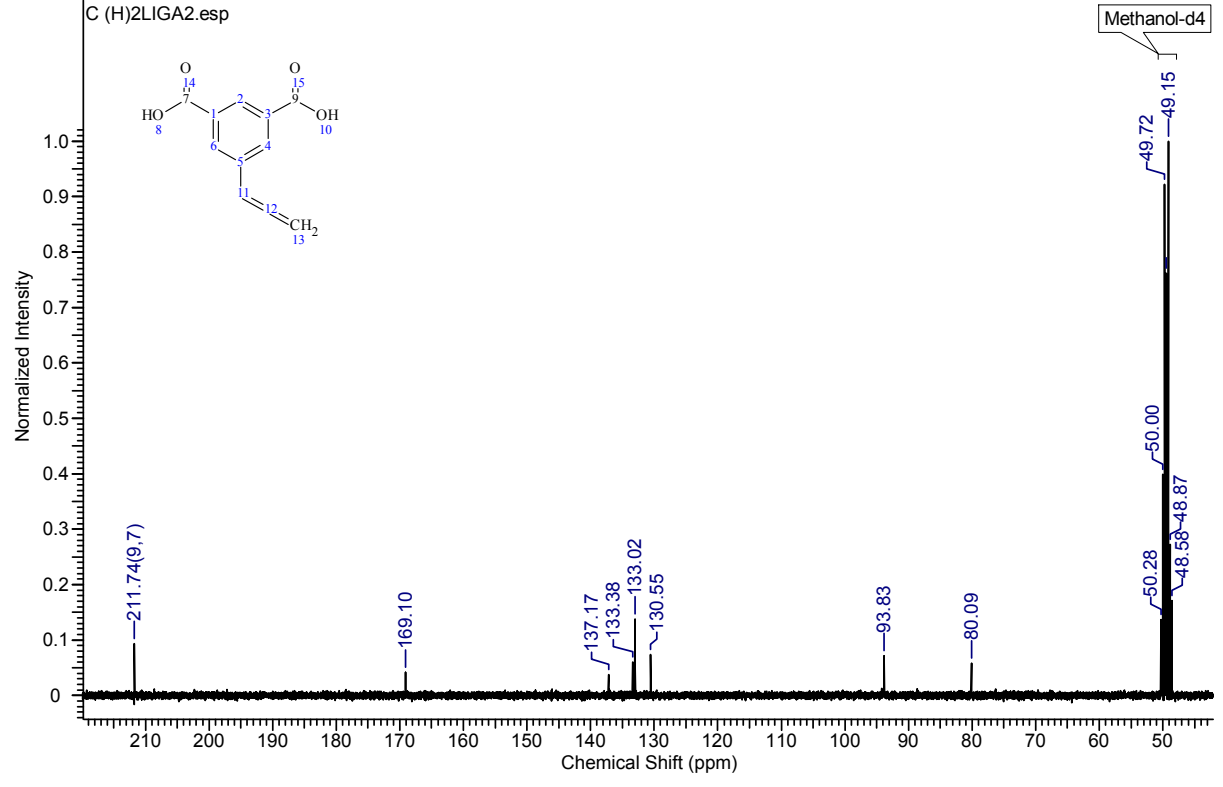

**S5: 50,000X magnification view of the Worm-like Morphology**

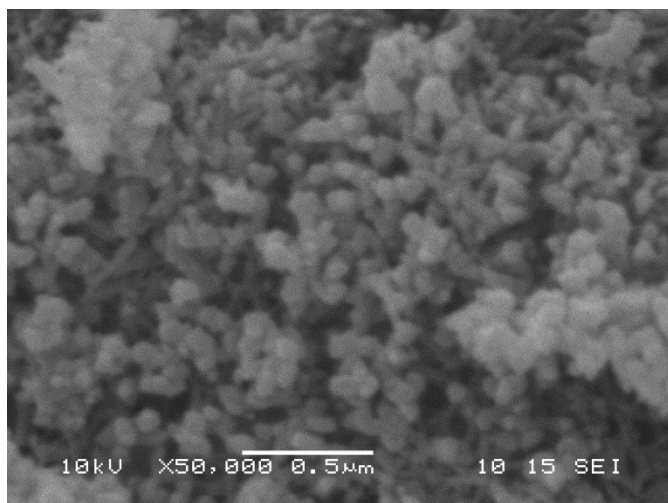

**S6: <sup>1</sup>H-NMR Spectrum digested 1% gel (expansion allene region) (DMSO-d6 + DCI)**

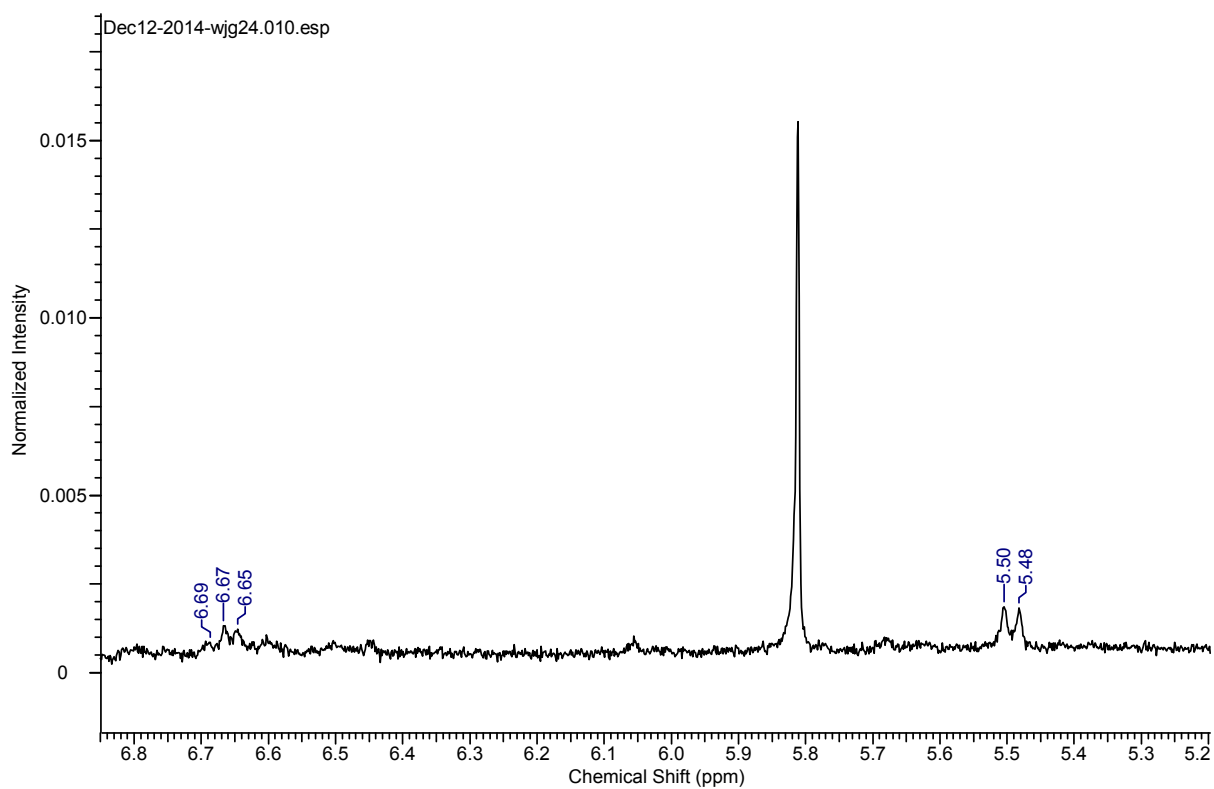

## S7: Dried Gel 1 IR spectrum

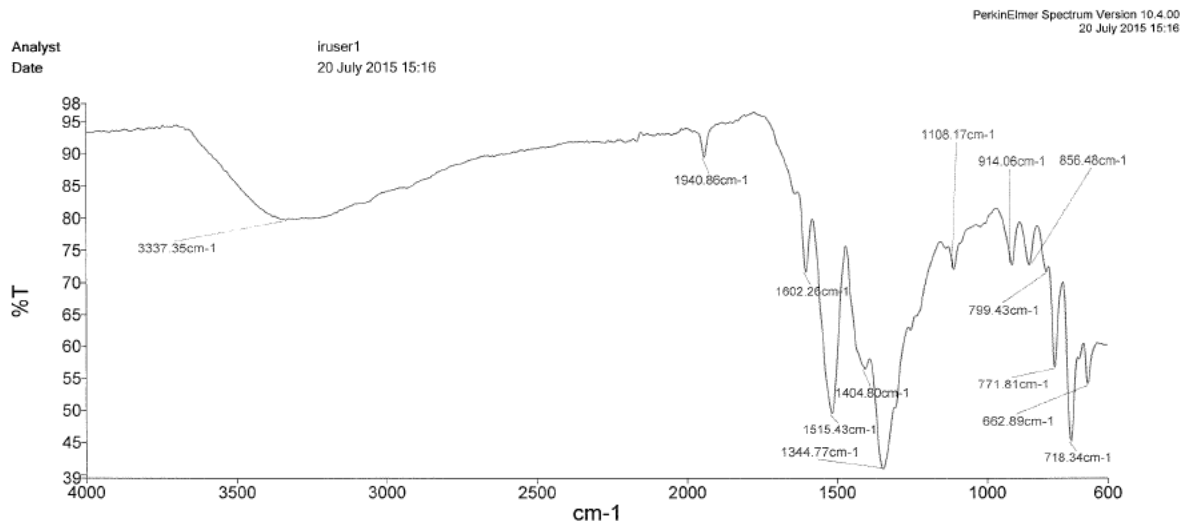

| Sample Name | Description                                     | Quality Checks                                                |
|-------------|-------------------------------------------------|---------------------------------------------------------------|
| iruser1 83  | Sample 083 By iruser1 Date Monday, July 20 2015 | The Quality Checks do not report any warnings for the sample. |

## S8: Crystalline 2 IR spectrum

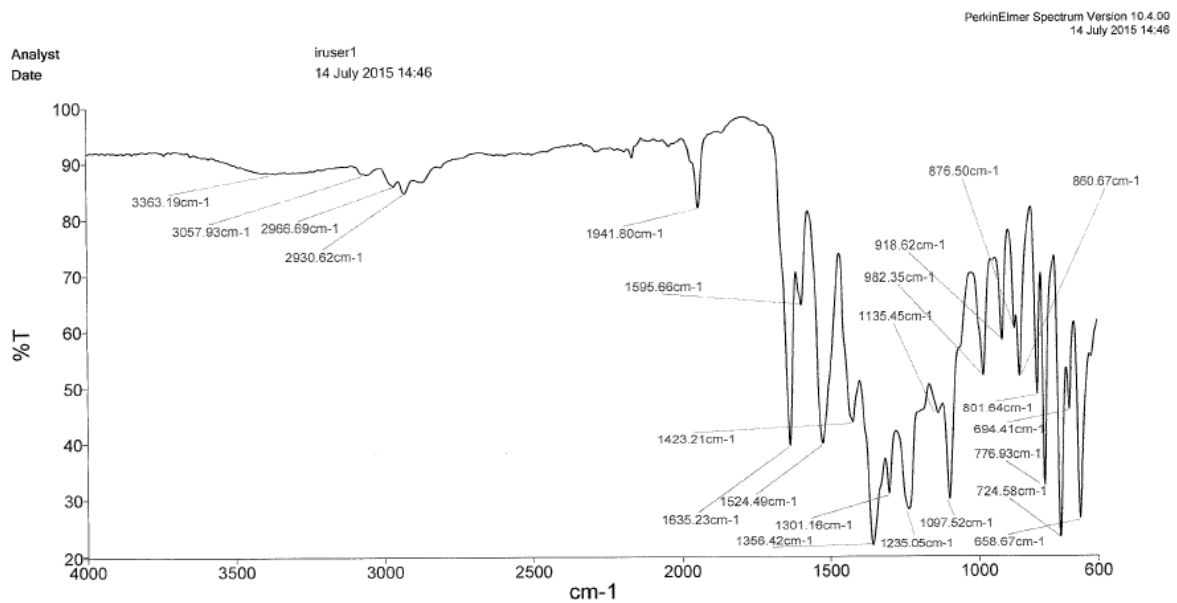

iruser1 22 Sample 022 By iruser1 Date Tuesday, July 14 2015
